# Supplementary material for: A new high-resolution multi-drought-index dataset for mainland China
Source: Copernicus journal article supplement (doi:10.5194/essd-17-837-2025), 2025-03-05
Supplement: Supplementary file 1 [file essd-17-837-2025-supplement.pdf]

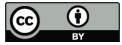

*Supplement of*

## **A new high-resolution multi-drought-index dataset for mainland China**

**Qi Zhang et al.**

*Correspondence to:* Chiyuan Miao ([miaocy@bnu.edu.cn](mailto:miaocy@bnu.edu.cn))

The copyright of individual parts of the supplement might differ from the article licence.

1 **Contents of this file**

2 S1–S11. Methods

3 Figures S1–S8

4

5

6 **S1. Methods: Correlation decay distance (CDD)**

7 The ADW interpolation method used for this study was the modified Shepard's  
8 algorithm, which introduces the concept of correlation decay distance (CDD), also called  
9 correlation length scale or decorrelation length (Shepard, 1984; Dunn et al., 2020). The  
10 CDD is defined as the distance at which the correlation between one station and all other  
11 stations decays below  $1/e$ , approximately corresponding to the significance level of 0.05  
12 for the correlation within large samples (Jones et al., 1997; Harris et al., 2020). The  
13 number of stations for interpolating the target grid cell is well constrained by the CDD,  
14 thus improving the interpolation precision (New et al., 2000; Mitchell and Jones, 2005;  
15 Hofstra and New, 2009). For every station, correlations ( $r$ ) and distances ( $x$ ) for each  
16 variable are shown in Figure S1, and the ordinary least-squares method was used to fit  
17 an exponential decay function:  $r = e^{-x/CDD}$ , take the meteorological variable Wind  
18 (Figure S1a), for example, the estimated CDD is 361 km (95 % confidence interval: 361  
19 km) at the 0.05 significance level.

20

21

22 **S2. Methods: Standardized precipitation index (SPI)**

23

24 The distribution of precipitation is generally not a normal distribution but a skewed  
25 distribution. Therefore, in precipitation analysis, drought monitoring, and assessment,

26 the distribution probability  $\Gamma$  is used to describe the change of precipitation. The  
 27 standardized precipitation index (SPI; McKee et al. 1993) is used to calculate the  
 28 distribution probability  $\Gamma$  of precipitation within a certain period of time, perform  
 29 normal standardization, and finally classify the drought level with the standardized  
 30 precipitation cumulative frequency distribution.

$$31 \quad f(x) = \frac{1}{\beta^\gamma \Gamma(\gamma)} x^{\gamma-1} e^{-x/\beta} \quad x > 0 \quad (S1)$$

32 where  $\beta > 0$  and  $\gamma > 0$  are scale and shape parameters, respectively.  $\beta$  and  $\gamma$  can be

33 obtained by the maximum likelihood estimation method:  $\hat{\gamma} = \left[ \frac{1}{4A} \left( 1 + \sqrt{1 + \frac{4A}{3}} \right) \right]$ ,  $\hat{\beta} =$

34  $\frac{\bar{x}}{\hat{\gamma}}$ ,  $A = \lg \bar{x} - \frac{1}{n} \sum_{i=1}^n \lg x_i$ , where  $x_i$  is a precipitation data sample and  $\bar{x}$  is the climate

35 average of precipitation. After the parameters in the probability density function are

36 determined, for the precipitation  $x_0$  in a certain year, the probability of an event in

37 which random variable  $x$  is less than  $x_0$  can be calculated as follows:

$$38 \quad F(x < x_0) = \int_0^{x_0} f(x) dx \quad (S2)$$

39 The event probability when the precipitation is 0 is estimated using the following

40 formula:

$$41 \quad F(x = 0) = m/n \quad (S3)$$

42 where  $m$  is the number of samples with precipitation of 0, and  $n$  is the total number

43 of samples. The  $\Gamma$  distribution probability is normalized by the normal distribution

44 function; that is, the probability values obtained by Equations (2) and (3) are substituted

45 into the normalized normal distribution function:

$$46 \quad F(x < x_0) = \frac{1}{\sqrt{2\pi}} \int_0^{x_0} e^{-\frac{Z^2}{2}} \quad (S4)$$

$$47 \quad Z = SPI = S \left( t - \frac{c_0 + c_1 t + c_2 t}{1 + d_1 t + d_2 t^2 + d_3 t^3} \right) \quad (S5)$$

48 where  $t = \sqrt{\ln \frac{1}{F^2}}$ ,  $F$  is the probability of finding (2) or (3); and when  $F > 0.5$ ,  $F = 1 -$

49  $F$ ,  $S = 1$ , when  $F \leq 0.5$ ,  $S = -1$ . The values of the coefficients are as follows:

50  $c_0 = 2.515517$ ,  $c_1 = 0.802853$ ,  $c_2 = 0.010328$ ,  $d_1 = 1.432788$ ,  $d_2 = 0.189269$ , and

51  $d_3 = 0.001308$ .

52

### 53 **S3. Methods: Standardized precipitation evapotranspiration index (SPEI)**

54 Both SPI and SPEI use a probability density function to fit time series. SPI uses a

55 parametric Gamma distribution to fit cumulative monthly precipitation time series. SPEI

56 is calculated similarly to SPI (Vicente-Serrano et al., 2010), using the cumulative

57 difference between monthly precipitation and potential evapotranspiration (PET) to

58 replace the precipitation variable, then using a three-parameter log-logistic distribution

59 to fit the data, and then using the inverse cumulative probability density function of the

60 standard normal distribution to convert to the drought index value (Li et al., 2020). First,

61 the PET is calculated. The second step is to calculate the difference between precipitation

62 (P) and PET,  $D = P - PET$ . The third step is to transform data  $D$  as SPI:

$$63 \quad F(x) = \left[ 1 + \left( \frac{\alpha}{x - \gamma} \right)^\beta \right]^{-1} \quad (S6)$$

64  $T$  is the probability of a definite  $D$  value:

$$65 \quad T = 1 - F(x) \quad (S7)$$

66 For  $T \leq 0.5$ ,

$$67 \quad W = \sqrt{-2 \ln(T)} \quad (S8)$$

68

$$69 \quad SPEI = W - \frac{(c_2 W + c_1)W + c_0}{[(d_3 W + d_2)W + d_1]W + 1} \quad (S9)$$

70 For  $T > 0.5$ ,

71 
$$W = \sqrt{-2 \ln(1 - T)} \quad (S10)$$

72 
$$SPEI = - \left( W - \frac{(c_2 W + c_1) W + c_0}{[(d_3 W + d_2) W + d_1] W + 1} \right) \quad (S11)$$

73

74 Values of coefficients are follows:  $c_0 = 2.515517$ ,  $c_1 = 0.802853$ ,  $c_2 = 0.010328$ ,  
75  $d_1 = 1.432788$ ,  $d_2 = 0.189269$ , and  $d_3 = 0.001308$ .

76

77

#### 78 **S4. Methods: Evaporative demand drought index (EDDI)**

79 In recent years, the indices for monitoring drought have mainly focused on water  
80 imbalance, because the physical actual evapotranspiration (AET)-based drought signal  
81 indices are used more and more frequently. These include the SPEI, soil water deficit  
82 index, evapotranspiration deficit index, remote sensing global drought severity index,  
83 etc. Although SPEI monitors drought on the basis of the difference between precipitation  
84 (P) and PET, PET is calculated on the basis of some formula or model; for example, PET  
85 obtained by Thornthwaite's method is estimated on the basis of average temperature,  
86 while reference crop evapotranspiration (ET<sub>0</sub>) is not directly measured or represented by  
87 a separate index. An index based only on physical ET<sub>0</sub> measurements will have several  
88 advantages: first, the physically based ET<sub>0</sub> index does not need to consider the  
89 availability of surface water, because it focuses on the atmospheric water demand rather  
90 than the difference between surface water supply and demand. Second, it avoids the  
91 difficulties inherent in remote sensing data: some remote sensing data are affected by  
92 various factors, such as satellite remote sensing data being limited by cloud cover or the  
93 time interval when the satellite passes over the ground. This may lead to data delays or  
94 missing data. The physically based ET<sub>0</sub> index avoids the difficulties of relying on these

95 data, because it does not need to use remote sensing data to infer water demand. EDDI  
96 was developed by Hobbins et al. (2016) as an indicator of atmospheric drying potential,  
97 which can indicate plant stress on the ground.

98 The rationale for this indicator is based on two main physical feedbacks between  
99 AET and  $ET_0$ : under conditions of water resource constraint (protracted drought), AET  
100 and  $ET_0$  change in opposite directions (Bouchet 1963), and under conditions of energy  
101 constraint at the onset of a sudden drought, they are in parallel (Fig. S8). Specifically,  
102 the magnitude of AET depends on the availability of energy (usually solar radiation, etc.)  
103 or water. If water limits evaporation, then atmospheric evaporation demand either plays  
104 a role in determining actual evaporation or is a reflection of it. For example, under non-  
105 water-constrained conditions,  $ET_0$  estimates the upper limit of (energy-constrained) AET,  
106 whereas under water-constrained conditions, land-atmosphere feedbacks from AET lead  
107  $ET_0$  towards opposite or complementary directions. If we use the examples of persistent  
108 and sudden droughts, persistent droughts indicate persistent deficits in soil moisture (SM)  
109 and fluxes associated with land-air interfaces, where water constraints affect AET.  
110 However, “rapid droughts” (i.e., rapidly developing droughts caused by strong, transient  
111 meteorological/radiometric changes, such as increasing temperature, wind speed,  
112 radiation or moisture decrease, without substantial change in precipitation) tend not to  
113 be affected by water constraints. Nevertheless,  $ET_0$  exhibited positive signals in both  
114 sustained and rapid droughts, indicating its value in monitoring droughts and as an early  
115 indicator of the development of drought conditions (Hobbins et al., 2016).

116

117

## 118 **S5. Methods: Palmer drought severity index (PDSI)**

119 PDSI is a drought index with clear physical meaning established by Palmer (1965).

120 It comprehensively considers many factors such as precipitation, soil moisture, runoff,  
 121 and potential evapotranspiration; it can reflect the impact of pre-season precipitation and  
 122 water supply and demand on later-period related factors; and it can effectively judge  
 123 long-term drought conditions (Dai et al., 2004).

124 The water balance equation for water supply and demand to reach climate  
 125 adaptation is as follows:

$$126 \quad P' = \alpha_i PET + \beta_i PR + \gamma_i PRO - \delta_i PL \quad (S12)$$

127  $P'$  represents the climate-suitable precipitation, and  $\alpha_i$ ,  $\beta_i$ ,  $\gamma_i$ , and  $\delta_i$  are the water  
 128 balance coefficients of each month  $i$  ( $i = 1, 2, 3, \dots, 12$ ), which can be defined as follows:

$$129 \quad \alpha_i = \frac{\overline{ET}_i}{\overline{PET}_i}, \beta_i = \frac{\overline{R}_i}{\overline{PR}_i}, \gamma_i = \frac{\overline{RO}_i}{\overline{PRO}_i}, \delta_i = \frac{\overline{L}_i}{\overline{PL}_i} \quad (S13)$$

130  $ET$ ,  $RO$ ,  $R$ , and  $L$  are respectively the actual evapotranspiration, actual flow, actual soil  
 131 water replenishment, and actual soil water loss in month  $i$ .  $PET$ ,  $PRO$ ,  $PR$ , and  $PL$  are  
 132 respectively the potential evapotranspiration, potential runoff, potential soil water  
 133 replenishment, and potential soil water loss. In this model,  $PR = AWC - (S_s + S_u)$ ,  
 134  $PRO = AWC - PR = S_s + S_u$ ,  $PL = PL_s + PL_u$ ,  $PL_s = \min(PE, S_s)$ ,  $PL_u = (PE - PL_s)S_u/AWC$ ,  
 135  $S_s$  is the initial effective upper soil water content, and  $S_u$  is the initial effective lower soil  
 136 water content. According to the AWC data recommended by Li et al. (2023), we adopted  
 137 the Global Gridded Surfaces of Selected Soil Characteristics data  
 138 ([https://daac.ornl.gov/cgi-bin/dsviewer.pl?ds\\_id=1006](https://daac.ornl.gov/cgi-bin/dsviewer.pl?ds_id=1006)).

139 Water deficit ( $d$ ) is the difference between actual precipitation ( $P$ ) and climate-  
 140 appropriate precipitation ( $P'$ ). In order to make PDSI a standardized index, after finding  
 141 the water deficit, we multiply it by the climate weight coefficient  $K$  of a given month in  
 142 a given place, and thus obtain the water anomaly index  $Z$ , also known as the Palmer  $Z$   
 143 index, which indicates the degree of deviation between the actual climate dry-wet  
 144 condition and its average water condition in a given month and place:  $Z = dK$ ; the value

145 of  $K$  is determined by the month and geographical location:

$$146 \quad K_i = \frac{a}{\sum_{j=1}^{12} \bar{D}_j K'_j} K'_i \quad (S14)$$

147 The empirical constant  $a = 17.67$  obtained by Palmer from the data of nine stations  
148 in seven states was revised to 16.84 according to the climate characteristics of China  
149 (Zhong et al., 2019), where  $\sum_{j=1}^{12} \bar{D}_j K'_j$  is the average annual absolute moisture anomaly  
150 over the years, with  $j$  representing January to December;

$$151 \quad K'_i = 1.6 \log_{10} \left( \frac{\overline{PET}_i + \bar{R}_i + \overline{RO}_i}{\bar{P}_i + \bar{L}_i} + 2.8 \right) + 0.4 \quad (S15)$$

152 where  $\bar{D}_i$  the multi-year average of the absolute value of the moisture anomaly  $d$  in  
153 month  $i$ . Finally, the PDSI value for each month is calculated as follows:

$$154 \quad X_i = pX_{i-1} + qZ_i \quad (S16)$$

155 where  $p$  and  $q$  are the duration factors that affect PDSI sensitivity. Palmer obtained  $p$   
156 as 0.897 and  $q$  as 1/3 based on two stations in central Iowa and western Kansas, but we  
157 revised them to  $p = 0.755$  and  $q = 1/1.63$  on the basis of data from weather stations in  
158 China. PDSI is a cumulative index—that is, an index where each successive value is  
159 based on the previous value. Specifically, any given PDSI value ( $X_i$ ) is the weighted sum  
160 of the previous PDSI value ( $X_{i-1}$ ) and the current humidity anomaly  $Z_i$ . For example,  
161 the current PDSI value ( $X_i$ ) is equal to  $q$  times the current water vapor outlier  $Z_i$  plus  $p$   
162 times the previous PDSI value ( $X_{i-1}$ ).

163

## 164 **S6. Methods: Self-calibrating palmer drought severity index (SC-PDSI)**

165 Based on PDSI, Wells et al. (2004) proposed and evaluated an SC-PDSI. Wells et al.  
166 (2004) believed that changing the ratio ( $\tilde{K}$ ) could solve the spatial inconsistency of PDSI  
167 without changing the way PDSI deals with seasonal climate changes.



168 
$$\tilde{K} = \frac{a}{\sum_{j=1}^{12} \bar{d}_j K'_j} K'_i \quad (S17)$$

169 Since  $\sum_{j=1}^{12} \bar{d}_j K'_j$  can be approximately regarded as the annual sum of the average  
 170 absolute value of  $Z$  ( $\tilde{Z} = \sum_{j=1}^{12} \bar{d}_j K'_j$ ), and the value of  $a$ , 17.67 as obtained by Palmer,  
 171 is the average value of  $\tilde{Z}$  (i.e., the annual average sum of vapor anomalies), and since  
 172 PDSI is based on cumulative vapor anomalies, so  $\tilde{K} = \frac{\text{expected average PDSI}}{\text{observed average PDSI}}$ . The non-  
 173 extreme value range of PDSI is defined as  $-4$  to  $4$ , but in practice this range is different.  
 174 Palmer (1965) argues that if the PDSI were truly a standardized measure of drought  
 175 severity, then values outside of that range ( $-4$  to  $4$ ) would occur with roughly the same  
 176 frequency. If the frequency of extreme events is  $f_e$ , then the  $f_e$ th percentile should be  
 177  $-4.00$  and the  $(100 - f_e)$ th percentile should be  $4.00$ . So  $\tilde{K} =$   
 178  $\frac{\text{expected } f_e \text{th percentile of the PDSI}}{\text{observed } f_e \text{th percentile of the PDSI}}$ . Defining an extreme drought as a “one in 50 year event”  
 179 does not determine the percentage of PDSI values below  $-4.00$ , as it may last two months  
 180 or two years. In this implementation, Wells et al. (2004) used an  $f_e$  value of 2%, which  
 181 resulted in the following climate characterization equation:

182 
$$K = \begin{cases} K'(-4 / 2nd \text{ percentile}), & \text{if } d < 0 \\ K'(4 / 98th \text{ percentile}), & \text{if } d \geq 0 \end{cases} \quad (S18)$$

183 Palmer found the duration factor empirically, based on the linear relationship between  
 184 the length of time and severity of the most extreme droughts he studied in Kansas and  
 185 Iowa. To estimate the severity of droughts, he summarized the  $Z$ -scores for severe  
 186 droughts and derived the following linear relationship:

187 
$$PDSI = -4.0 \Rightarrow \sum_{i=1}^t Z_i = -1.236t - 10.764 \quad (S19)$$

188 
$$PDSI = -3.0 \Rightarrow \sum_{i=1}^t Z_i = -0.927t - 8.073 \quad (S20)$$

189 
$$PDSI = -2.0 \Rightarrow \sum_{i=1}^t Z_i = -0.618t - 5.382 \quad (S21)$$

190 
$$PDSI = -1.0 \Rightarrow \sum_{i=1}^t Z_i = -0.309t - 2.691 \quad (S22)$$

191 
$$\sum_{i=1}^t Z_i = (0.309t + 2.691)X_t \quad (S23)$$

192 The linear relationship from (19) to (23) can be simplified to (24) for a given PDSI value  
 193  $X_t = -4, -3, -2,$  and  $-1$ .

194 
$$\sum_{i=1}^t Z_i = (mt + b) \frac{X_t}{C} \quad (S24)$$

195 It is not difficult to find that when  $C = -4, m = -1.236,$  and  $b = -10.764,$  (24) is equal  
 196 to (19); (24) can also be derived in a generalized form as follows:

197 
$$X_t = \left(1 - \frac{m}{m+b}\right)X_{t-1} + \frac{C}{m+b}Z_t \quad (S25)$$

198 Thus, the persistence factor  $p = \left(1 - \frac{m}{m+b}\right),$  and  $q = \frac{C}{m+b}.$

199 In practical analysis, because different regions have different sensitivities to  
 200 precipitation events and some regions have different sensitivities to precipitation and  
 201 non-precipitation periods, two sets of duration factors are needed. SC-PDSI establishes  
 202 a separate duration factor for dry and wet periods, so that the sensitivity of the index  
 203 depends on local climate and has different sensitivities to wetness and moisture deficit.

204 We summarize the calculation steps of SC-PDSI as follows, after Wells et al. (2004):

- 205 (1) First, calculate moisture departures according to (12) and (13),  $d = P - P'$ ;  
 206 (2) Calculate  $K$  according to  $K'$  in (15), and then calculate the moisture anomaly index,  
 207  $Z = dK$ ;  
 208 (3) Calculate the index duration factor using the least squares method under extremely  
 209 wet and extremely dry conditions:  $\sum_{i=1}^t Z_i = mt + b$ ; this will give two sets of

- 210 parameters  $m$  and  $b$ . Calculate  $m$  and  $b$  according to the results of (13);  
 211 (4) Substitute  $m$  and  $b$  into Equation (25) to calculate PDSI;  
 212 (5) Recalculate  $K$  according to (18) after finding the 98th and 2nd percentiles of PDSI;  
 213 (6) Substitute the results of (10) into  $Z = dK$  to get the new  $Z$ ;  
 214 (7) Return to step 3 again to get the new  $m$  and  $b$ , and finally get SC-PDSI.

215

## 216 **S7. Methods: Vapor pressure deficit (VPD)**

217 Saturated vapor pressure is a function of temperature and can be directly calculated  
 218 from temperature, as shown in the Tetens empirical formula (Allen et al., 1998):

$$219 \quad e^0(T) = 0.6108 \exp\left(\frac{17.27T}{T + 237.3}\right) \quad (S26)$$

220 where  $e^0(T)$  is the saturated water vapor pressure at temperature (kPa) at the air  
 221 temperature  $T$  (°C). Since the above equation is a nonlinear function, for the average  
 222 saturated vapor pressure with such a long interval at the monthly scale, if the average  
 223 temperature is used to replace the daily maximum and minimum temperatures, the  
 224 estimated value of the average saturated vapor pressure will be low, and the  
 225 corresponding vapor pressure difference will be small. Therefore, the mean value of the  
 226 saturated vapor pressure corresponding to the daily average maximum and minimum  
 227 temperatures within the time interval is used for calculation (Li et al., 2014):

$$228 \quad e_s = \frac{e^0(T_{max}) + e^0(T_{min})}{2} \quad (S27)$$

229 where  $e_s$  is the average saturated vapor pressure (kPa), and  $T_{max}$  and  $T_{min}$  are the  
 230 daily average highest and lowest air temperature (°C), respectively. The actual vapor  
 231 pressure  $e_a$  (kPa) is calculated according to the monthly average relative humidity  
 232 ( $\varphi_{mean}$ ):  $e_a = e_s \frac{\varphi_{mean}}{100}$ , and  $VPD = e_s - e_a$ .

233

234 **S8. Methods: Slope of the saturated vapor pressure**

$$\Delta = \frac{4098 \times [0.6108 \times \exp(\frac{17.27T}{t + 237.3})]}{(T + 237.3)^2} \quad (S28)$$

235 where  $\Delta$  is the slope of the saturated vapor pressure temperature relationship (kPa ·  
236 °C<sup>-1</sup>)

237

238 **S9. Methods: Psychrometric constant**

$$\gamma = \frac{c_p P}{\varepsilon \lambda} = 0.665 \times 10^{-3} P \quad (S29)$$

$$P = 101.3 \times \left(\frac{293 - 0.0065z}{293}\right)^{5.26} \quad (S30)$$

239 where  $\gamma$  is the psychrometric constant (kPa · °C<sup>-1</sup>);  $\lambda$  is the latent heat of evaporation  
240 (2.45 MJ · kg<sup>-1</sup>);  $\varepsilon$  is the molecular weight ratio of water to air (0.622);  $c_p$  is the  
241 specific heat of air at constant pressure (1.013 × 10<sup>-3</sup> MJ · kg<sup>-1</sup>°C<sup>-1</sup>);  $P$  is atmospheric  
242 pressure (kPa); and  $z$  is local elevation (m).

243

244 **S10. Methods: Vapor pressure of the air**

$$e^o(T) = 0.618 \exp\left(\frac{17.27T}{T + 237.3}\right) \quad (S31)$$

$$e_a = \frac{RH_{mean}}{100} [e^o(T)] \quad (S32)$$

$$e_s = \frac{e^o(T_{max}) + e^o(T_{min})}{2} \quad (S33)$$

245 where  $RH_{mean}$  is the mean daily relative humidity;  $T_{max}$  is the maximum temperature  
246 (°C);  $T_{min}$  is the minimum temperature (°C); and  $e^o(T)$  is the saturation vapor  
247 pressure function (kPa).

248

249 **S11. Methods: Net radiation at the ground surface**

250 The first step is to calculate the extraterrestrial radiation ( $R_a$ ). The daily  
 251 extraterrestrial radiation at different latitudes during the year can be estimated from the  
 252 solar constant, the magnetic declination of the sun, and the day's position during the year.

$$R_a = \frac{24 \times 60}{\pi} G_{sc} d_r [\omega_s \sin(\varphi) \sin(\delta) + \cos(\varphi) \cos(\delta) \sin(\omega_s)] \quad (S34)$$

253 where  $R_a$  is extraterrestrial radiation ( $\text{MJ} \cdot \text{m}^{-2} \text{day}^{-1}$ );  $G_{sc}$  is the solar constant and  
 254 takes the value of  $0.082 \text{ (MJ} \cdot \text{m}^{-2} \text{min}^{-1})$ ;  $d_r$  is the average distance between the Earth  
 255 and the sun, calculated by equation (35);  $\delta$  is the magnetic declination of the sun (rad),  
 256 calculated by equation (36);  $\varphi$  is latitude (rad); and  $\omega_s$  is the sunset hour angle,  
 257 calculated by equation (37).

$$d_r = 1 + 0.033 \cos\left(\frac{2\pi}{365} J\right) \quad (S35)$$

$$\delta = 0.408 \sin\left(\frac{2\pi}{365} J - 1.39\right) \quad (S36)$$

258 where J indicates the day order, ranging from 1 to 365 or 366.

$$\omega_s = \arccos[-\tan(\varphi) \tan(\delta)] \quad (S37)$$

259 If the observed value of solar radiation  $R_s$  is not available, it can be obtained from  
 260 the formula for the relationship between solar radiation and extraterrestrial radiation and  
 261 relative insolation:

$$R_s = \left(a_s + b_s \frac{n}{N}\right) R_a \quad (S38)$$

262 where  $n$  is actual sunshine hours (h);  $N$  is the maximum possible sunshine hours; and  $a_s$   
 263 and  $b_s$  vary with atmospheric conditions (humidity, dust) and the sun's magnetic  
 264 declination (latitude and month). When there are no actual solar radiation data and  
 265 empirical parameters to use, it is recommended to use  $a_s = 0.25$  and  $b_s = 0.5$ .

266 Net short-wave radiation at the surface is calculated by the balance of received and  
 267 reflected solar radiation:

$$R_{ns} = (1 - \alpha)R_s \quad (S39)$$

268 where  $R_{ns}$  is net solar radiation or shortwave radiation ( $\text{MJ} \cdot \text{m}^{-2} \text{day}^{-1}$ ); and  $\alpha$  is  
 269 albedo, where the albedo of the reference crop of green grassland is 0.23.

270 When near sea level or when empirical parameters are available for  $a_s$  and  $b_s$ , the  
 271 clear-sky solar radiation is calculated by the following formula:

$$R_{so} = (a_s + b_s)R_a \quad (S40)$$

272 where  $R_{so}$  is clear-sky solar radiation ( $\text{MJ} \cdot \text{m}^{-2} \text{day}^{-1}$ ).

273 The net long-wave radiation ( $R_{nl}$ ) is calculated as follows. Long-wave radiation is  
 274 proportional to the 4th power of the absolute surface temperature, and this relationship  
 275 can be quantified by the Stefan-Boltzmann law. However, due to atmospheric absorption  
 276 and downward radiation, the net energy flux at the surface is less than the value  
 277 calculated using the Stefan-Boltzmann law. Water vapor, clouds, carbon dioxide, and  
 278 dust all absorb and emit long-wave radiation, and their concentrations should be known  
 279 when estimating net expended radiation fluxes. Due to the large influence of humidity  
 280 and cloud cover, these two factors are used to estimate the net expenditure flux of long-  
 281 wave radiation using the Stefan-Boltzmann law, and the concentration of other absorbers  
 282 is assumed to be constant:

$$R_{nl} = \sigma \left[ \frac{T_{max,K}^4 + T_{min,K}^4}{2} \right] (0.34 - 0.14\sqrt{e_a}) \left( 1.35 \frac{R_s}{R_{so}} - 0.35 \right) \quad (S41)$$

283 where  $\sigma$  is the Stefan-Boltzmann constant with a value of  $4.903 \times 10^{-9}$  ( $\text{MJ} \cdot$   
 284  $\text{K}^{-4} \text{m}^{-2} \text{day}^{-1}$ );  $T_{max,K}$  is the highest absolute temperature in a day (24 hours) in  
 285 Kelvin ( $\text{K}$ ;  $\text{K} = ^\circ\text{C} + 273.16$ );  $T_{min,K}$  is the lowest absolute temperature in a day (24  
 286 hours) in Kelvin; and  $(0.34 - 0.14\sqrt{e_a})$  is the corrected term for air humidity: if the air  
 287 humidity increases, the value of this term will become smaller;  $(1.35 \frac{R_s}{R_{so}} - 0.35)$  is the  
 288 revised term for the cloud cover, and if the amount of cloud increases,  $R_s$  will decrease

289 and the value of this term will decrease accordingly.

290 The net radiation  $R_n$  is the difference between the incoming short-wave net  
291 radiation  $R_{ns}$  and the outgoing long-wave net radiation  $R_{nl}$ :

$$R_n = R_{ns} - R_{nl} \quad (\text{S42})$$

292

293

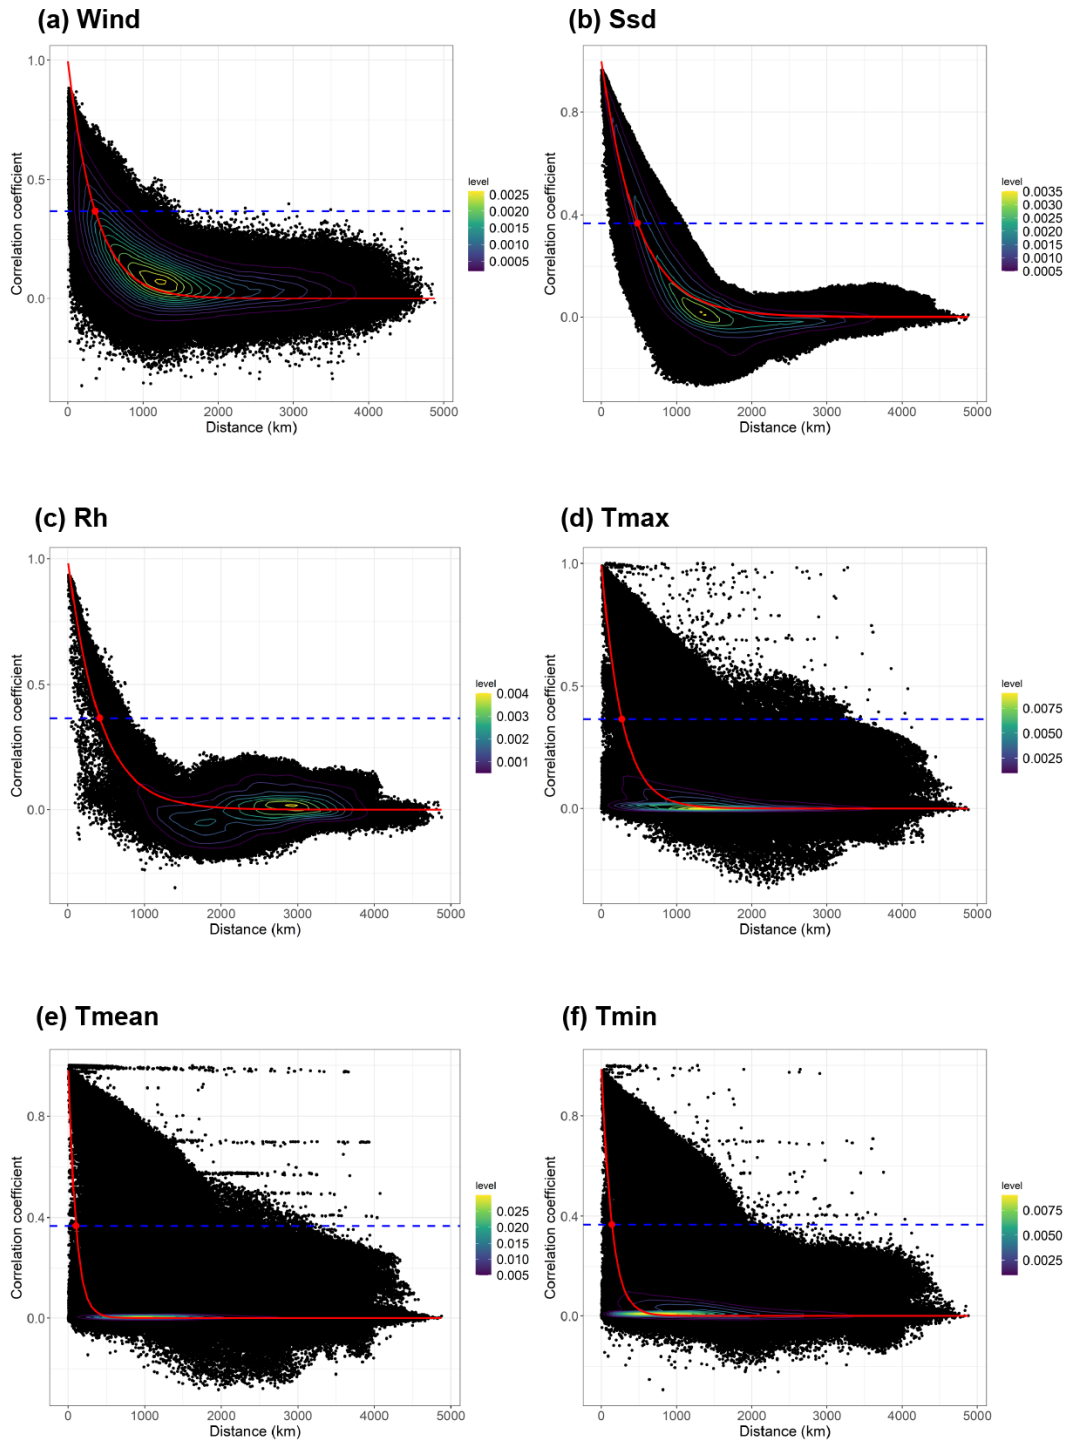

294  
 295 **Figure S1:** Kernel density visualization of the Correlation Decay Distance (CDD) and  
 296 the distribution for meteorological variables (Wind $\approx$ 361, Ssd $\approx$ 480, Rh $\approx$ 420, Tmax $\approx$  272,  
 297 Tmean $\approx$  99, Tmin $\approx$  136) for all stations within the interpolated domain. Black points  
 298 show the distance–correlation pair for each station. The blue line is the exponential curve  
 299 fitted to the data by ordinary least squares. The red dashed line marks where correlation  
 300 equals 1/e.



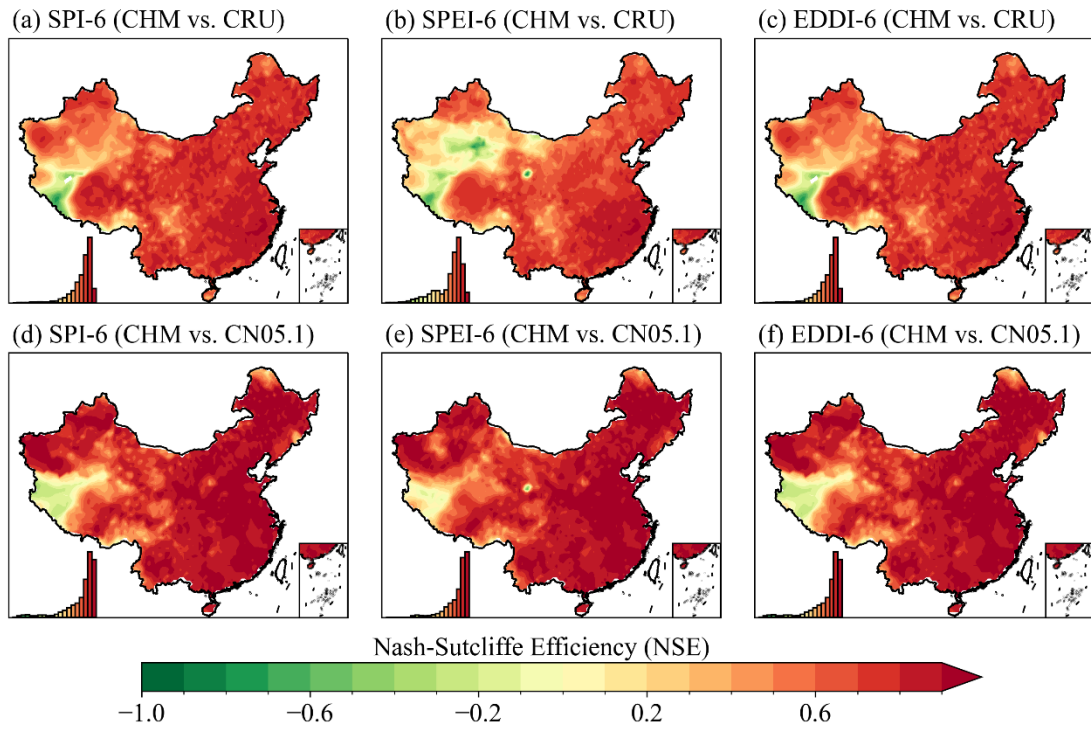

302

303

**Figure S2:** (a–c) Spatial distributions of NSE for SPI-6, SPEI-6, and EDDI-6 based

304

on CHM and CRU data. (d–f) Spatial distributions of NSE for SPI-6, SPEI-6, and EDDI-

305

6 based on CHM and CN05.1 data. The histogram at the bottom left in each subplot

306

shows the distribution of NSE values for all grid cells.

307

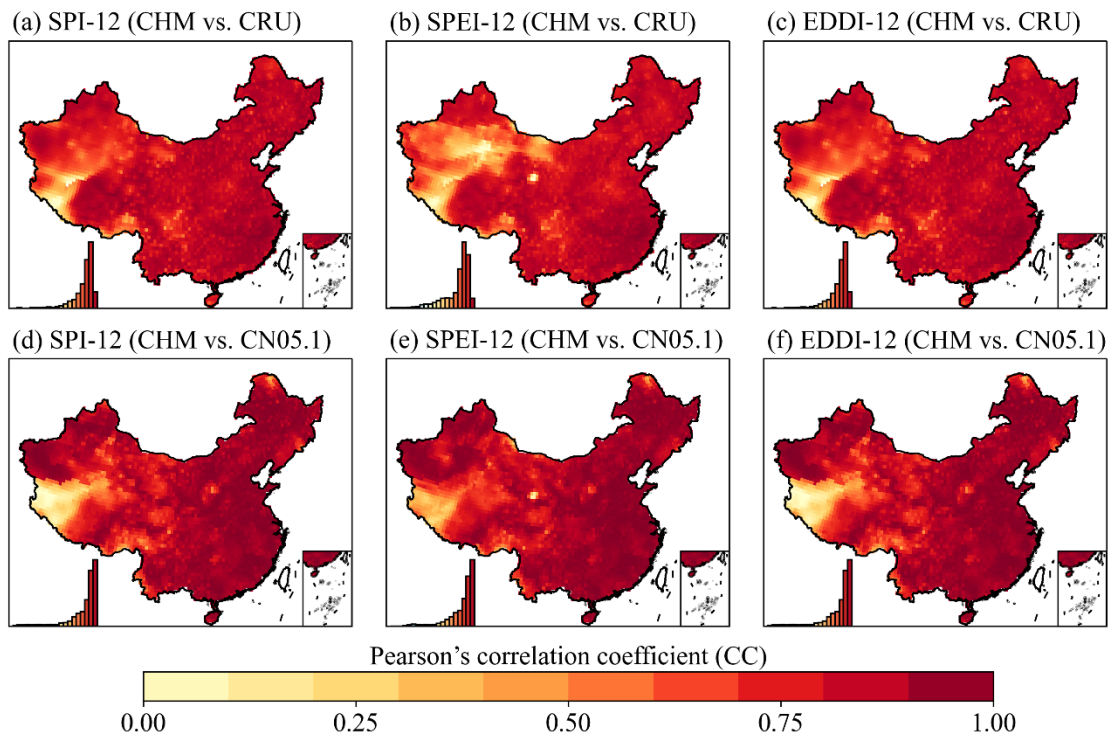

308

309 **Figure S3:** (a–c) Correlation spatial distributions of SPI-12, SPEI-12, and EDDI-12  
 310 based on CHM and CRU data. (d–f) Correlation spatial distributions of SPI-12, SPEI-  
 311 12, and EDDI-12 based on CHM and CN05.1 data. The histogram at the bottom left in  
 312 each subplot shows the distribution of correlation coefficients for all grid cells.

313

314

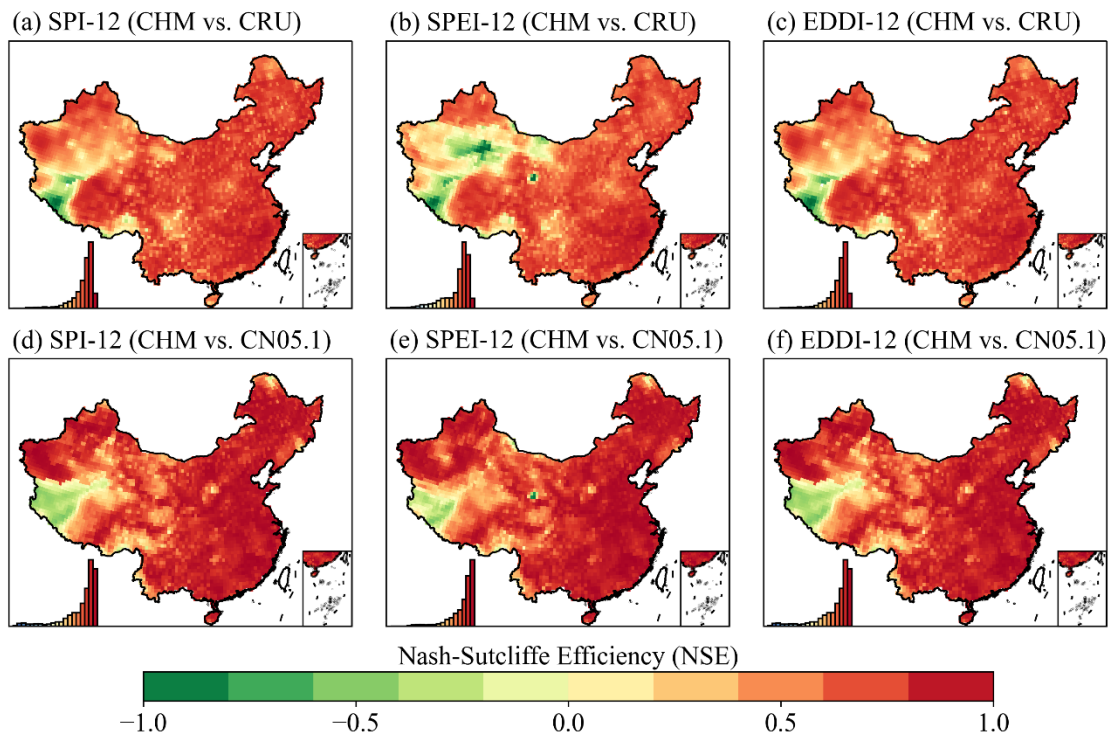

315

316 **Figure S4:** (a–c) Spatial distributions of NSE of SPI-12, SPEI-12, and EDDI-12 based  
 317 on CHM and CRU data. (d–f) Spatial distributions of NSE of SPI-12, SPEI-12, and  
 318 EDDI-12 based on CHM and CN05.1 data. The histogram at the bottom left in each  
 319 subplot shows the distribution of NSE values for all grid cells.

320

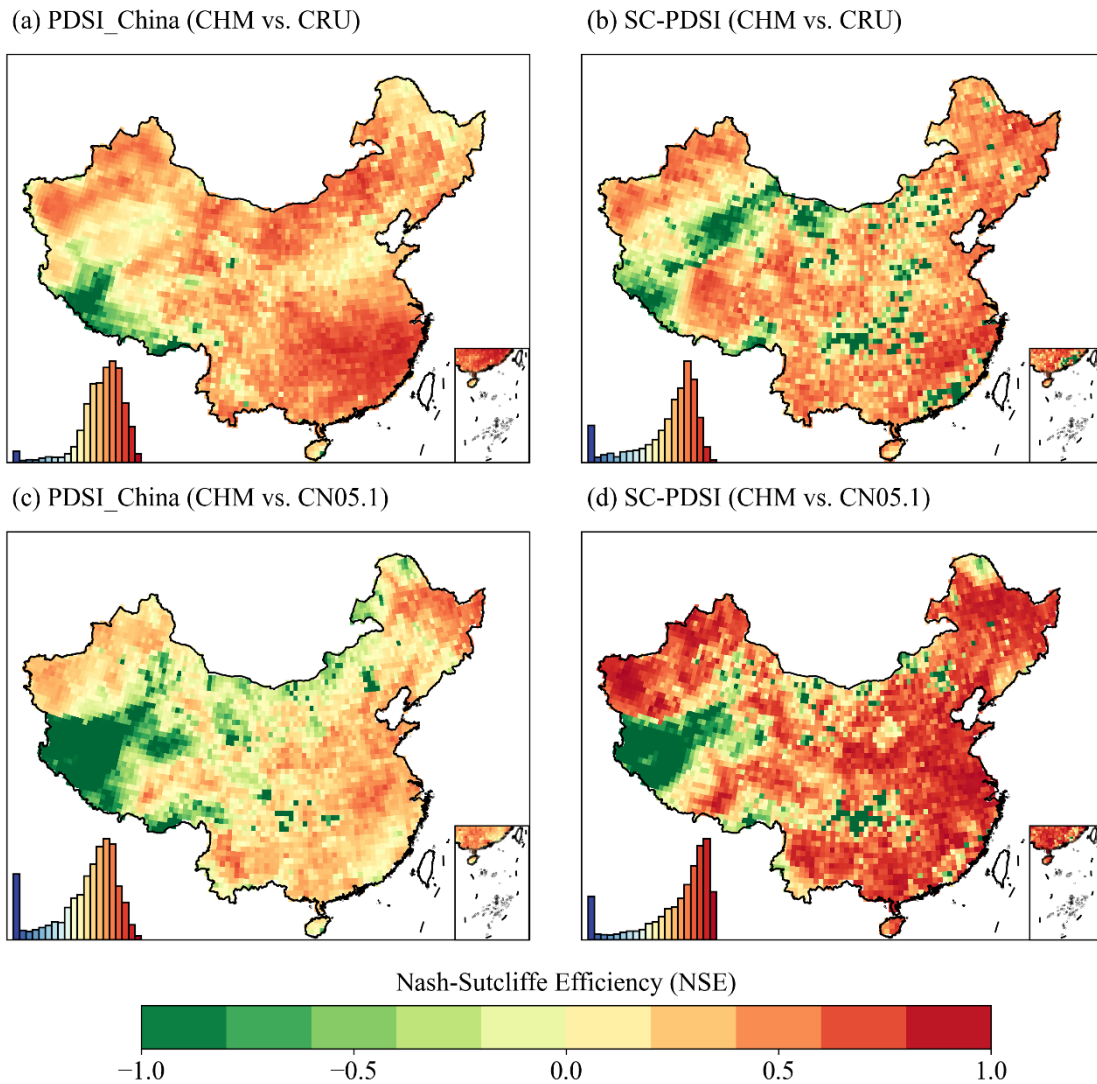

322

323 **Figure S5:** (a, b) Spatial distributions of NSE of PDSI\_China and SC-PDSI based on  
 324 CHM and CRU data. (c, d) Spatial distributions of NSE of PDSI\_China, and SC-PDSI  
 325 based on CHM and CN05.1 data. The histogram at the bottom left in each subplot shows  
 326 the distribution of NSE values for all grid cells.

327

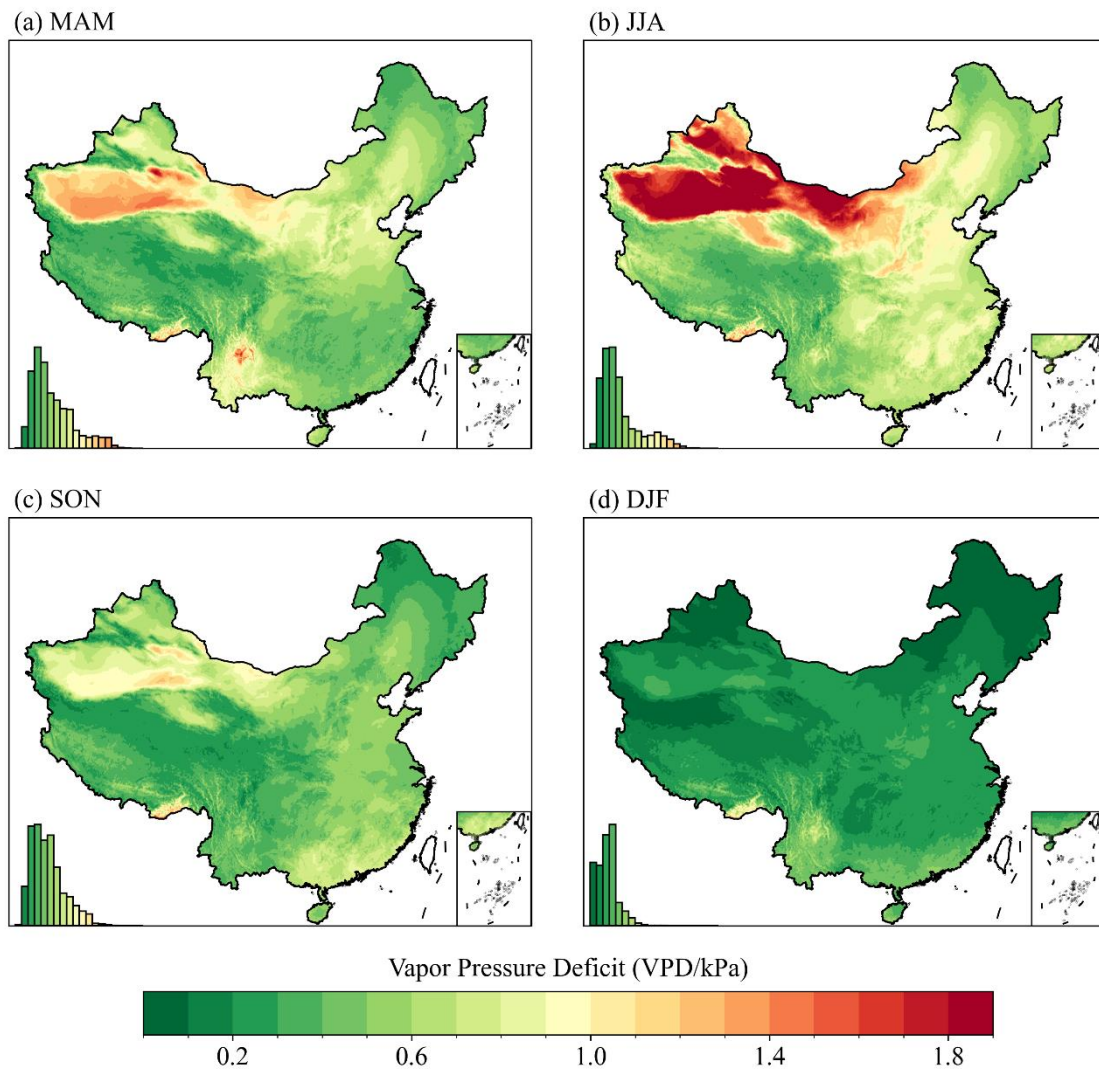

328

329 **Figure S6:** Spatial distribution of seasonal VPD in China, 1961–2022. (a) Spring  
 330 (March–April–May, MAM). (b) Summer (June–July–August, JJA). (c) Autumn  
 331 (September–October–November, SON). (d) Winter (December–January–February,  
 332 DJF). The histogram at the bottom left in each subplot shows the distribution of VPD  
 333 values for all grid cells.

334

## VPD (CHM) vs. NDVI

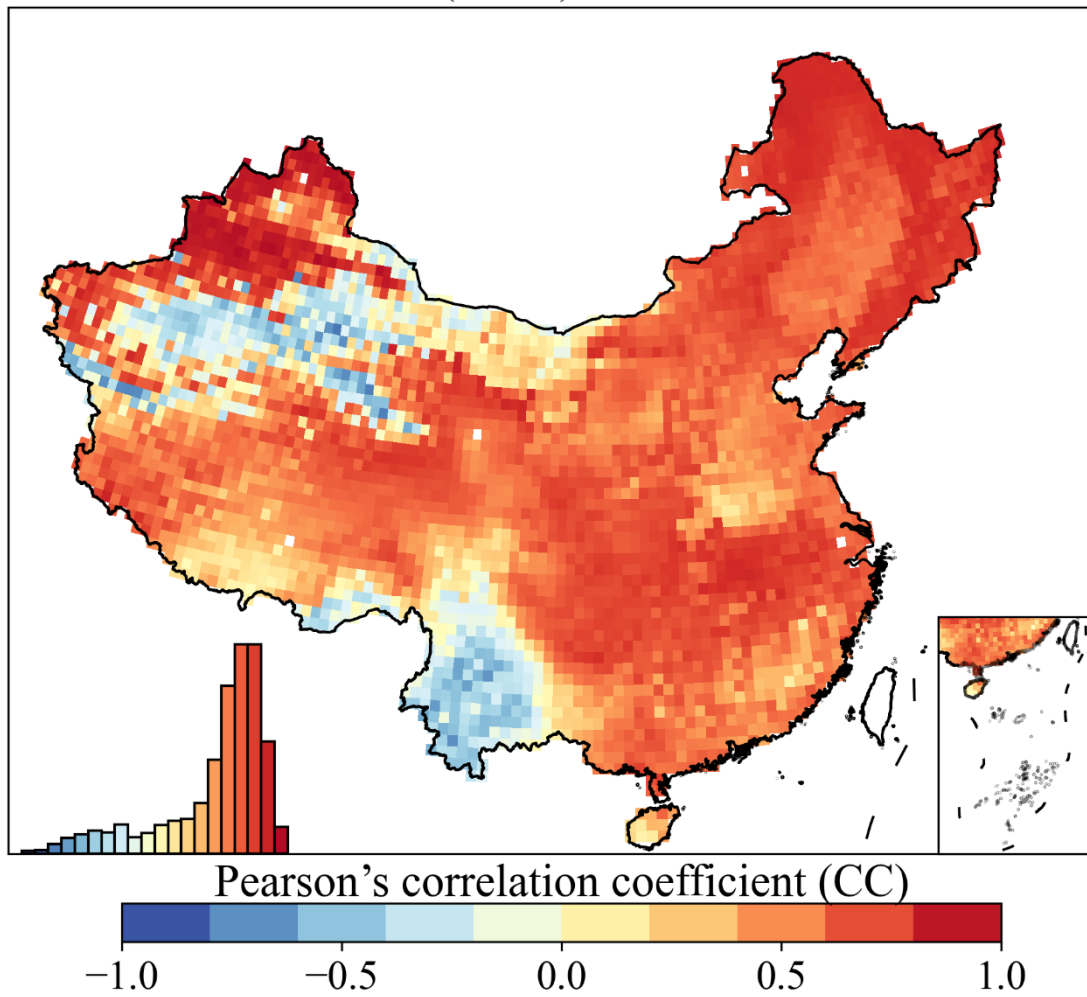

335

336 **Figure S7:** Spatial distributions of correlations between NDVI and VPD based on  
337 CHM. The histogram at the bottom left shows the distribution of correlation  
338 coefficients for all grid cells.

339

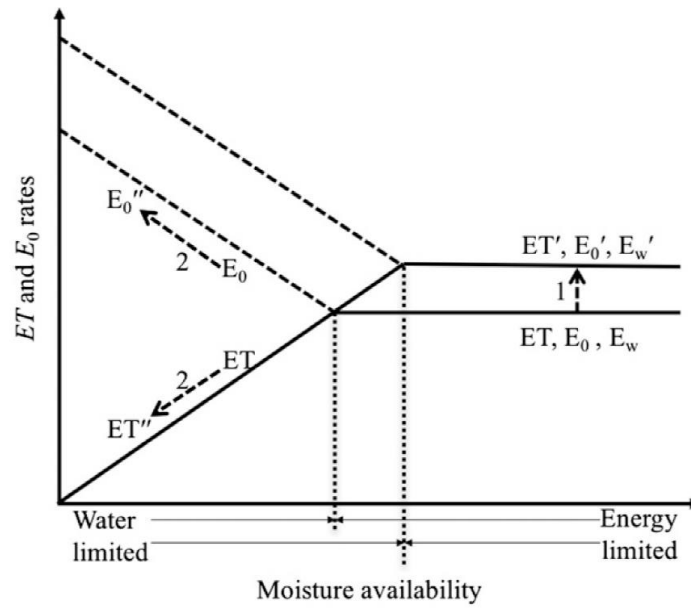

340

341 **Figure S8:** Idealized parallel and complementary responses of AET and  $ET_0$  ( $E_0$  in figure)

342 to varying moisture and energy conditions. Figure adapted from Hobbins et al. (2016).

343 **References**

- 344 Dai, A., Trenberth, K. E., and Qian, T.: A global dataset of Palmer Drought Severity  
345 Index for 1870–2002: Relationship with soil moisture and effects of surface  
346 warming, *J Hydrometeorol*, 5, 1117–1130,  
347 <https://doi.org/10.1016/j.molcel.2017.04.015>, 2004.
- 348 Dai, A.: Drought under global warming: a review, *Wiley Interdisciplinary Reviews:*  
349 *Climate Change*, 2, 45-65, <https://doi.org/10.1002/wcc.81>, 2011
- 350 Dunn, R. J. H., Alexander, L. V., Donat, M. G., Zhang, X., Bador, M., Herold, N.,  
351 Lippmann, T., Allan, R., Aguilar, E., Barry, A. A., Brunet, M., Caesar, J., Chagnaud,  
352 G., Cheng, V., Cinco, T., Durre, I., de Guzman, R., Htay, T. M., Wan Ibadullah, W.  
353 M., Bin Ibrahim, M. K. I., Khoshkam, M., Kruger, A., Kubota, H., Leng, T. W., Lim,  
354 G., Li-Sha, L., Marengo, J., Mbatha, S., McGree, S., Menne, M., de los Milagros  
355 Skansi, M., Ngwenya, S., Nkrumah, F., Oonariya, C., Pabon-Caicedo, J. D.,  
356 Panthou, G., Pham, C., Rahimzadeh, F., Ramos, A., Salgado, E., Salinger, J., Sané,  
357 Y., Sopaheluwakan, A., Srivastava, A., Sun, Y., Timbal, B., Trachow, N., Trewin,  
358 B., van der Schrier, G., VazquezAguirre, J., Vasquez, R., Villarroel, C., Vincent, L.,  
359 Vischel, T., Vose, R., and Bin Hj Yussof, M. N. A.: Development of an updated  
360 global land in situ-based data set of temperature and precipitation extremes:  
361 HadEX3, *J. Geophys. Res.-Atmos.*, 125, e2019JD032263,  
362 <https://doi.org/10.1029/2019JD032263>, 2020.
- 363 Jones, P. D., Osborn, T. J., and Briffa, K. R.: Estimating sampling errors in large-scale  
364 temperature averages, *J. Climate*, 10, 2548–2568,  
365 [https://doi.org/10.1175/15200442\(1997\)010<2548:ESEILS>2.0.CO;2](https://doi.org/10.1175/15200442(1997)010<2548:ESEILS>2.0.CO;2), 1997.
- 366 Harris, I., Osborn, T. J., Jones, P., and Lister, D.: Version 4 of the CRU TS monthly high-  
367 resolution gridded multivariate climate dataset, *Sci. Data*, 7, 109,



368 <https://doi.org/10.1038/s41597-0200453-3>, 2020.

369 Hobbins, M. T., Wood, A., McEvoy, D. J., Huntington, J. L., Morton, C., Anderson, M.,  
370 and Hain, C.: The evaporative demand drought index. Part I: Linking drought  
371 evolution to variations in evaporative demand, *J Hydrometeorol*, 17, 1745–1761,  
372 <https://doi.org/10.1175/JHM-D-15-0121.1>, 2016.

373 Hofstra, N. and New, M.: Spatial variability in correlation decay distance and influence  
374 on angular-distance weighting interpolation of daily precipitation over Europe, *Int.*  
375 *J. Climatol.*, 29, 18721880, <https://doi.org/10.1002/joc.1819>, 2009.

376 Li, L., She, D., Zheng, H., Lin, P., and Yang, Z.-L.: Elucidating Diverse Drought  
377 Characteristics from Two Meteorological Drought Indices (SPI and SPEI) in China,  
378 *J Hydrometeorol*, 21, 1513–1530, <https://doi.org/10.1175/jhm-d-19-0290.1>, 2020.

379 Mckee, T., Doesken, N., Kleist, J., 1993. The relationship of drought frequency and  
380 duration to time scales *Proceedings of the 8th Conference on Applied Climatology.*  
381 American Meteorological Society, Boston, MA.

382 Mitchell, T. D. and Jones, P. D.: An improved method of constructing a database of  
383 monthly climate observations and associated high-resolution grids, *Int. J. Climatol.*,  
384 25, 693–712, <https://doi.org/10.1002/joc.1181>, 2005.

385 New, M., Hulme, M., and Jones, P.: Representing twentieth century space–time climate  
386 variability. part II: development of 1901–96 monthly grids of terrestrial surface  
387 climate, *J. Climate*, 13, 2217–2238,  
388 [https://doi.org/10.1175/15200442\(2000\)013<2217:RTCSTC>2.0.CO;2](https://doi.org/10.1175/15200442(2000)013<2217:RTCSTC>2.0.CO;2), 2000.

389 Palmer, W.C., 1965. *Meteorological Drought.* US Department of Commerce, Weather  
390 Bureau, Washington, DC.

391 Shepard, D. S.: Computer Mapping: The SYMAP Interpolation Algorithm, in: *Spatial*  
392 *Statistics and Models*, edited by: Gaile, G. L., and Willmott, C. J., Springer

393 Netherlands, Dordrecht, 133–145, [https://doi.org/10.1007/978-94-017-3048-8\\_7](https://doi.org/10.1007/978-94-017-3048-8_7),  
394 1984.

395 Vicente-Serrano, S. M., Beguería, S., and López-Moreno, J. I.: A multiscalar drought  
396 index sensitive to global warming: The standardized precipitation  
397 evapotranspiration index, *J Clim*, 23, 1696–1718,  
398 <https://doi.org/10.1175/2009JCLI2909.1>, 2010.

399 Wells, N., Goddard, S., and Hayes, M. J.: A self-calibrating Palmer Drought Severity  
400 Index, *J Clim*, 17, 2335–2351, [https://doi.org/10.1175/1520-  
401 0442\(2004\)017<2335:ASPDSI>2.0.CO;2](https://doi.org/10.1175/1520-0442(2004)017<2335:ASPDSI>2.0.CO;2), 2004.

402 Zhong, R., Chen, X., Lai, C., Wang, Z., Lian, Y., Yu, H., and Wu, X.: Drought monitoring  
403 utility of satellite-based precipitation products across mainland China, *J Hydrol*,  
404 568,343–359, <https://doi.org/10.1016/j.jhydrol.2018.10.072>, 2019.

405
